# Supplementary material
Source: publisher site journal article supplement (https://www.dovepress.com/article/600770)
Supplement: Supplementary file 1 [file 600770%20Revised%20Supplementary%20Material.docx]

**Supplementary Materials**


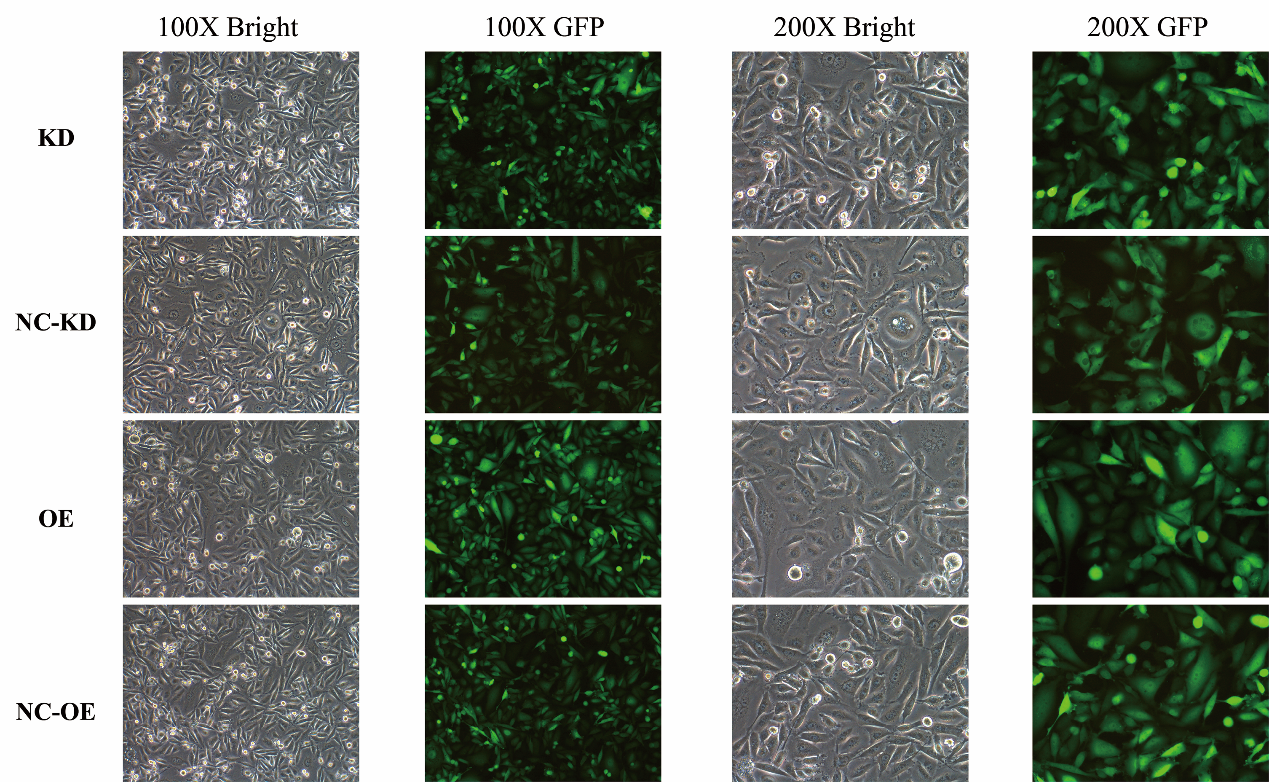


Figure S1 Breast cancer cells with knocked-down and overexpressed hsa_circ_0000520. Validation of knockdown and overexpression of hsa_circ_0000520 in breast cancer cells.

Table S1 Sequences of primers used in this study

| Gene | Primer sequences |
| --- | --- |
| Hsa_circ_0000520-Convergent | F:5’-CCACGAGCTGAGTGCGTCCTG-3’ |
| R:5’-GCTCAGGGAGAGCCCTGTTAGG-3’ |
| Hsa_circ_0000520-Divergent | F: 5’-GGGGAGGGAAGCTCATCAGT-3’ |
| R: 5’-CTGTTAGGGCCGCCTCTG-3’ |
| RPPH1-Convergent | F: 5’-GGAAGGTCTGAGACTAGGGC-3’ |
| R: 5’-TCCTGCCCAGTCTGACCTC-3’ |
| RPPH1-Divergent | F: 5’-CAATTCAGACTACTCTCCTCCG-3’ |
| R: 5’-TCTGGCCCTAGTCTCAGAC-3’ |
| Human-GAPDH | F: 5’-AGAAGGCTGGGGCTCATTTG-3’ |
| R: 5’-GCAGGAGGCATTGCTGATGAT-3’ |
| U6 | F: 5’-CTCGCTTCGGCAGCACA-3’ |
| R: 5’-AACGCTTCACGAATTTGCGT-3’ |
| GAPDH | F: 5’-tccatggcaccgtcaag-3’ |
|  | R: 5’-cagccttctccatggtgg-3’ |
| ACTB | F: 5’-GCGTGACATTAAGGAGAAGC-3’ |
|  | R: 5’-CCACGTCACACTTCATGATGG-3’ |
| Hsa_circ_0000520-qPCR | F: 5’-TTGGGAAGGTCTGAGACTAGGG-3’ |
| R: 5’-CCACTGATGAGCTTCCCTCC-3’ |

Table S2 Sequences of probes used in this study

| Name | Probe sequences |
| --- | --- |
| Hsa_circ_0000520 | P1: ATGAGCTTCCCTCCCCGAAGCTCAG |
|  | P2: TGATGAGCTTCCCTCCCCGAAG |
|  | P3: CCACTGATGAGCTTCCCTCCCCGAA |
| LacZ probe | P1: CTGAATATCGACGGTTTCCA |
|  | P2: GCTGTATCGCTGGATCAAAT |
|  | P3: GTCGTTTTACAACGTCGTGA |

Table S3 Antibodies used in this study

| Name | Manufactures | Application |
| --- | --- | --- |
| HSP90AA1 | Proteintech, Chicago, USA | 1:5000 for WB |
| β-actin | Cell Signaling Technology, Beverly, MA, USA | 1:1000 for WB |
| Goat anti-Rabbit IgG | Invitrogen, California, USA | 1:2000 for WB |

Table S4 The mass spectrometry result of hsa_circ_0000520 pulldown (top 20)

| Protein | Avg. Mass |
| --- | --- |
| MYH9 | 226532.23 |
| C3 | 187148.06 |
| EFTUD2 | 109435.77 |
| MVP | 99326.89 |
| HSP90B1 | 92468.86 |
| HSP90AA1 | 84659.71 |
| HSP90AB1 | 83264.195 |
| PABPC1 | 70670.836 |
| PABPC3 | 70030.92 |
| KRT6B | 60066.953 |
| VIM | 53651.676 |
| KRT14 | 51561.465 |
| IGHM | 49439.74 |
| KRT18 | 48057.805 |
| IGHG1 | 36105.91 |
| IGHG4 | 35940.555 |
| IGHG2 | 35900.637 |
| H1-2 | 21364.748 |
| IGKV2D-26 | 13297.138 |
| IGKV2D-29 | 13143.124 |
